# Supplementary material for: Biomarkers of Muscle Metabolism in Peripheral Artery Disease: A Dynamic NIRS-Assisted Study to Detect Adaptations Following Revascularization and Exercise Training
Source: MDPI journal article supplement (doi:10.3390/diagnostics10050312), 2020-05-16
Supplement: s1 [file s1]

Supplementary Material

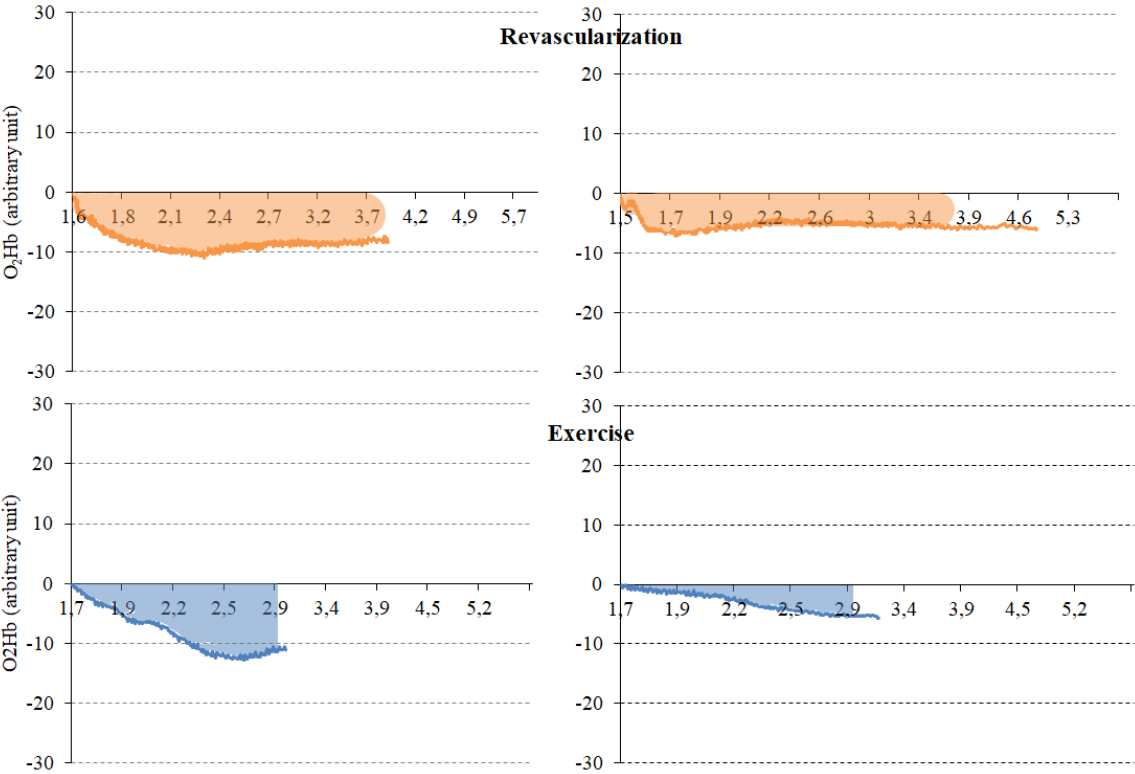

Figure S1. Representation of oxygenated hemoglobin trace and MMB-oxy (colored area) at baseline (a) and after interventions (b) in one patient for each group.
